# Supplementary material for: Feasibility and sustainability of emerging CCU pathways for formic acid production
Source: Royal Society of Chemistry journal article supplement (doi:10.1039/d4gc02507e), 2024-01-01
Supplement: d4gc02507e1.pdf [file d4gc02507e1.pdf]

## Supplementary Information

### Feasibility and sustainability of emerging CCU pathways for formic acid production

Tesfalem Aregawi Atsbha <sup>b</sup>, Ha-Jun Yoon <sup>a</sup>, Ali Cherif <sup>c</sup>, and Chul-Jin Lee <sup>a,b,\*</sup>

<sup>a</sup> Department of Chemical Engineering, Chung-Ang University, 84

Heukseok-ro, Dongjak-gu, Seoul, Republic of Korea

<sup>b</sup> Department of Intelligent Energy and Industry, Chung-Ang University, 84 Heukseok-ro,

Dongjak-gu, Seoul, Republic of Korea,

<sup>c</sup> Bureau of Economic Geology, The University of Texas at Austin, TX 78758, USA

\*Corresponding author: C.-J. Lee

Associate Professor,

Department of Chemical Engineering, Chung-Ang University, 84

Heukseok-ro, Dongjak-gu, Seoul, Republic of Korea

Department of Intelligent Energy and Industry, Chung-Ang University, 84 Heukseok-ro,

Dongjak-gu, Seoul, Republic of Korea

Tel.: +82 2 820 5941

Fax: +82 2 824 3495

E-mail: [cjlee@cau.ac.kr](mailto:cjlee@cau.ac.kr)

VLE validation results for important pairs involved in separation procedure based on the experimental data

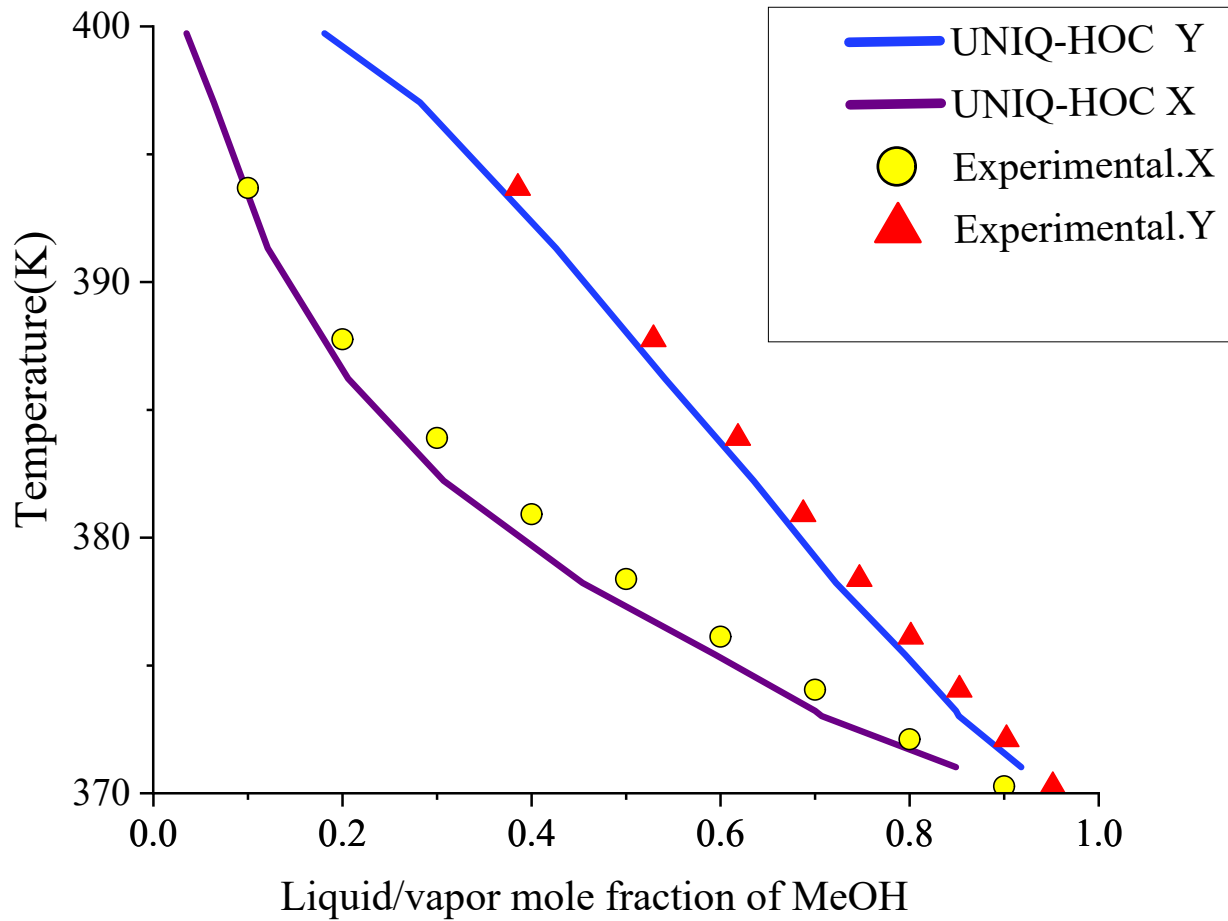

Fig.S1. T<sub>XY</sub> diagram for H<sub>2</sub>O/MeOH (3 bar) for the conventional process. Experimental data is from Hirata et al<sup>1</sup>.

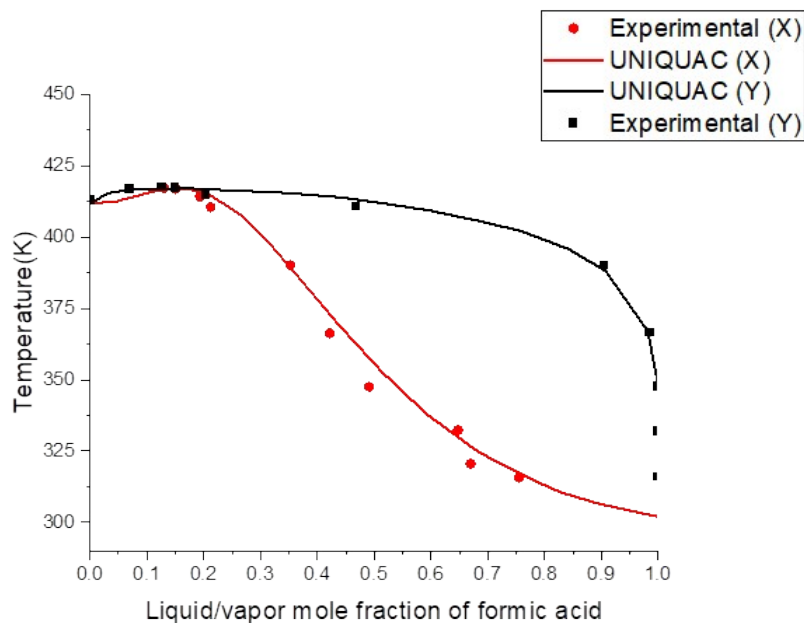

Fig.S2.  $T_{XY}$  diagram Formic acid/n-butylemidazol mixture for the thermo-catalytic process at 50 mmHg<sup>2</sup>.

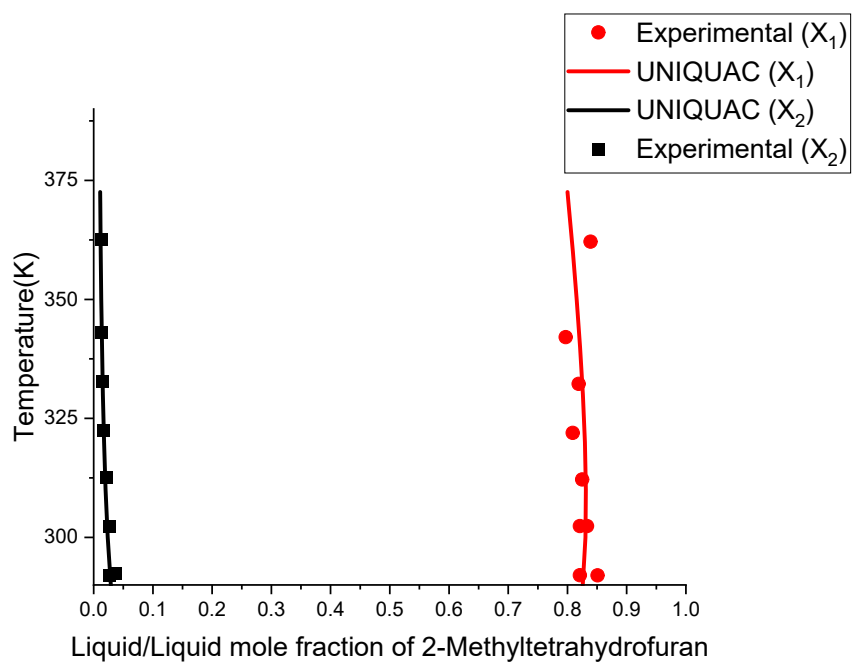

Fig.S3.  $T_{XX}$  diagram of water and 2-methyltetrahydrofuran LLE data for the electrochemical reduction process. The Experimental data was obtained from M. Glass et al (2017) <sup>3</sup>.

Table S1. Process operating conditions and parameters used for designing the electrochemical reduction downstream process.

| Unit operation          | Parameter                   | Value                                                          | Reference                         |
|-------------------------|-----------------------------|----------------------------------------------------------------|-----------------------------------|
| PSA                     | Operating conditions        | 400 °C, 30 bar                                                 | X. Zhu et al. <sup>4</sup>        |
|                         | H <sub>2</sub> purification | 99.99 mol%                                                     |                                   |
|                         | Catalyst                    | Fe <sub>2</sub> O <sub>3</sub> -Cr <sub>2</sub> O <sub>3</sub> |                                   |
| Extractor               | Operating conditions        | 40 °C, 1 bar                                                   | A.T. Laitinen et al. <sup>5</sup> |
| Azeotropic Distillation | Operating conditions        | 1.1 bar, equilibrium                                           | A.T. Laitinen et al. <sup>5</sup> |
| Striper                 | Operating conditions        | 4 bar, equilibrium                                             | A.T. Laitinen et al. <sup>5</sup> |

Table S2. CO<sub>2</sub> electrolyzer techno-economic assumption parameters and process operating conditions.

| Parameter                                  | Value                    | Reference                             |
|--------------------------------------------|--------------------------|---------------------------------------|
| Electrolyzer faradaic efficiency (HCOOH)   | 90%                      | X. Jiang et al. <sup>6</sup>          |
| Current density                            | 500 A/cm <sup>2</sup>    | X. Jiang et al. <sup>6</sup>          |
| catalyst                                   | BiO <sub>n</sub> cluster | X. Jiang et al. <sup>6</sup>          |
| HCOOH concentration                        | ~5.04 g/l                | K. Fernández-Caso et al. <sup>7</sup> |
| Total CO <sub>2</sub> conversion           | 44%                      | X. Jiang et al. <sup>6</sup>          |
| Reference electrolyzer total cost per area | \$48,493/m <sup>2</sup>  | J.M. Spurgeon et al. <sup>8</sup>     |
| scaling factor                             | 0.65                     |                                       |

Table S3. PSA gas separation and recycle techno-economic assumption parameters<sup>9</sup>.

| <b>Parameter</b>                                                                            | <b>Value</b>                                        |
|---------------------------------------------------------------------------------------------|-----------------------------------------------------|
| Reference total gas flow to separator                                                       | 4.40 x 10 <sup>6</sup> mol/h                        |
| Reference separator/recycle cost, 2018 USD                                                  | 11,214,299                                          |
| Scaling exponent                                                                            | 0.65                                                |
| CO <sub>2</sub> recycling efficiency                                                        | 97%                                                 |
| CO loss to recycle                                                                          | 0%                                                  |
| Case-dependent total gas flow to separator                                                  | Y mol/h                                             |
| CO <sub>2</sub> /CO separator/recycle scaled capital expense                                | $[Y/(4.40 \times 10^6)]^{0.65} \times (11,214,299)$ |
| Reference power to operate separator/recycle                                                | 10 kW                                               |
| Reference annual energy usage to operate separator/recycle<br>8.76 x 10 <sup>4</sup> kWh/yr | 8.76 x 10 <sup>4</sup> kWh/yr                       |

Table S4. List of parameters with their cost reference

| <b>Materials and utilities</b>             | <b>Cost</b>                 |
|--------------------------------------------|-----------------------------|
| Gray H <sub>2</sub> (USD/kg)               | 1.88 <sup>10</sup>          |
| Green H <sub>2</sub> (USD /kg)             | 3.53 <sup>11</sup>          |
| Captured CO <sub>2</sub> (USD /kg)         | 0.035 <sup>12</sup>         |
| TREA (USD /kg)                             | 2.5 (from www.alibaba.com)  |
| Catalyst (CH <sub>3</sub> ONa, in USD /kg) | 3.5 (from www.alibaba.com)  |
| Catalyst (Ru/bpyTN-30-CTF, in USD /g)      | 175.35/g <sup>13</sup>      |
| Catalyst (BiO <sub>n</sub> , in USD /g)    | 1.8/g <sup>14</sup>         |
| KOH (USD /kg)                              | 0.6 (from www.alibaba.com)  |
| 2-Methyltetrahydrofuran (USD /kg)          | 2.5 (from www.alibaba.com)  |
| O <sub>2</sub> (Tonne /hr)                 | 38.07(from www.alibaba.com) |
| CO (USD /Tonne)                            | 70 <sup>15</sup>            |
| Methanol (USD /Tonne)                      | 420(from www.alibaba.com)   |
| CO <sub>2</sub> from DAC (USD /kg)         | 0.17 <sup>17</sup>          |
| Cooling water (USD 0.028/ Tonne)           | 0.354 <sup>16</sup>         |
| Electricity (USD /kWh)                     | 0.06 <sup>16</sup>          |
| LP Steam (USD /GJ)                         | 14.05 <sup>16</sup>         |
| MP steam (USD /GJ)                         | 14.83 <sup>16</sup>         |
| HP Steam (USD/GJ)                          | 17.7 <sup>16</sup>          |

Table S5. Total capital investment estimation used based on the ratio factor for fluid processing plant.

|                                           | <b>Ratio factor for fluid processing plant (of delivered equipment cost)</b> | <b>Reference</b>              |
|-------------------------------------------|------------------------------------------------------------------------------|-------------------------------|
| <b>Direct cost</b>                        |                                                                              | MS Peters et al <sup>18</sup> |
| Delivery, % of purchased equipment        | 0.1                                                                          |                               |
| Subtotal: Purchased equipment (delivered) | 1                                                                            |                               |
| Purchased equipment installation          | 0.47                                                                         |                               |
| Instrumentation and Controls              | 0.36                                                                         |                               |
| Piping                                    | 0.68                                                                         |                               |
| Electrical systems                        | 0.11                                                                         |                               |
| Buildings (including services)            | 0.18                                                                         |                               |
| Yard improvements                         | 0.1                                                                          |                               |
| Service facilities                        | 0.7                                                                          |                               |
| <b>Indirect cost</b>                      |                                                                              |                               |
| Engineering and supervision               | 0.33                                                                         |                               |
| Construction expenses                     | 0.41                                                                         |                               |
| Legal expences                            | 0.04                                                                         |                               |
| Contractor's fee                          | 0.22                                                                         |                               |
| Contingency                               | 0.44                                                                         |                               |
| <b>Working capital (WC)</b>               | <b>0.89</b>                                                                  |                               |

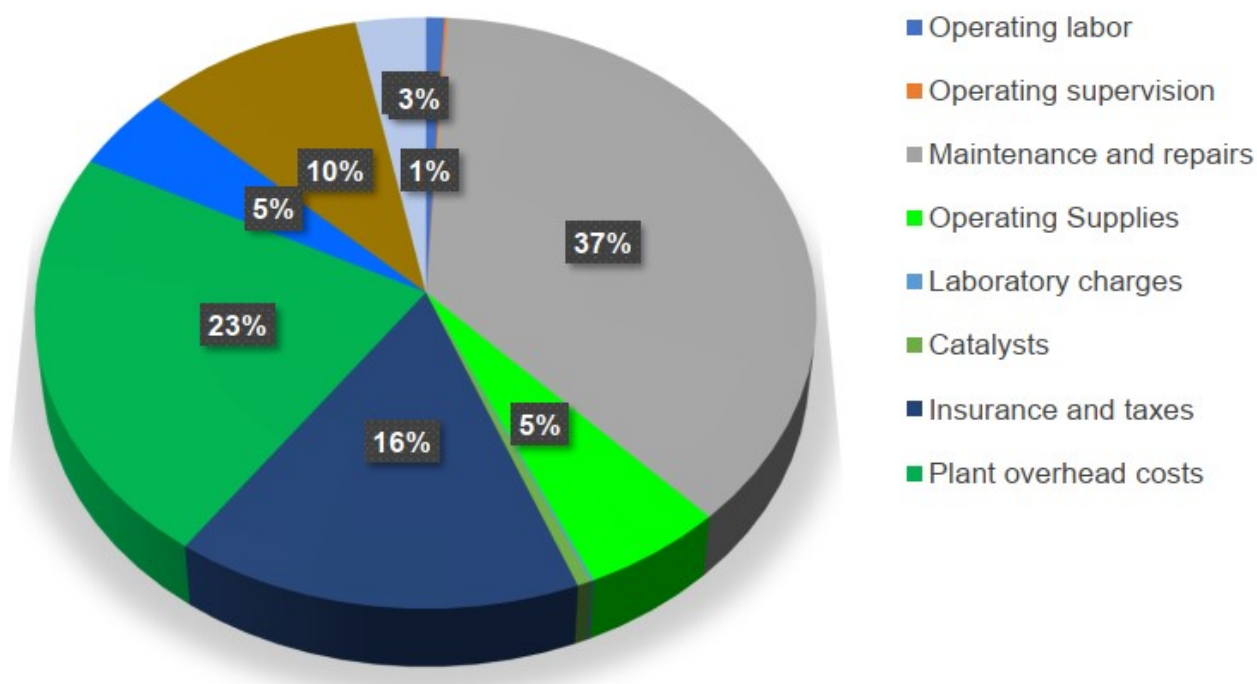

Fig.S4. cost break down of other operational expenses for the electrochemical reduction pathway (CCUER)



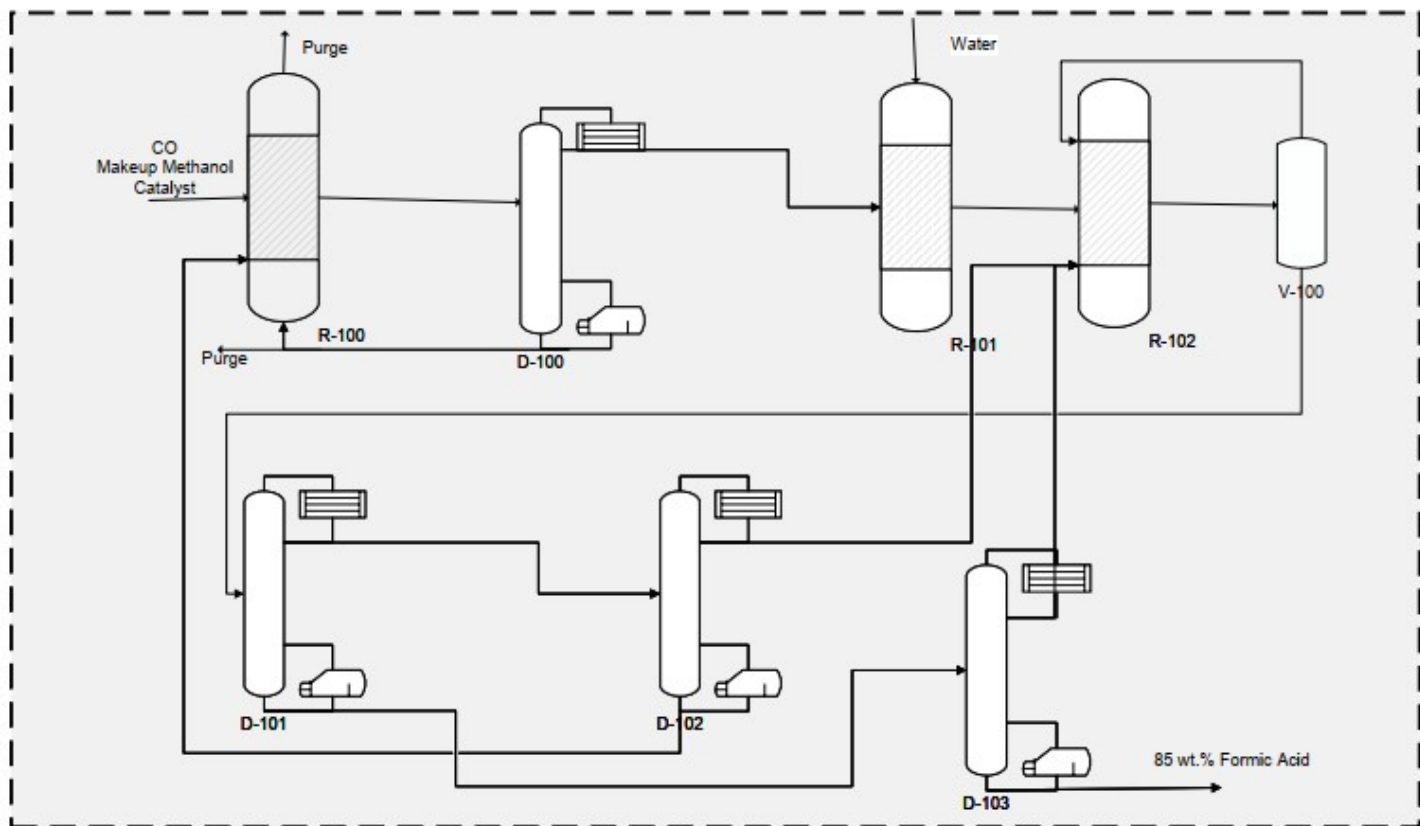

Fig.S5. System boundary of the conventional process pathway

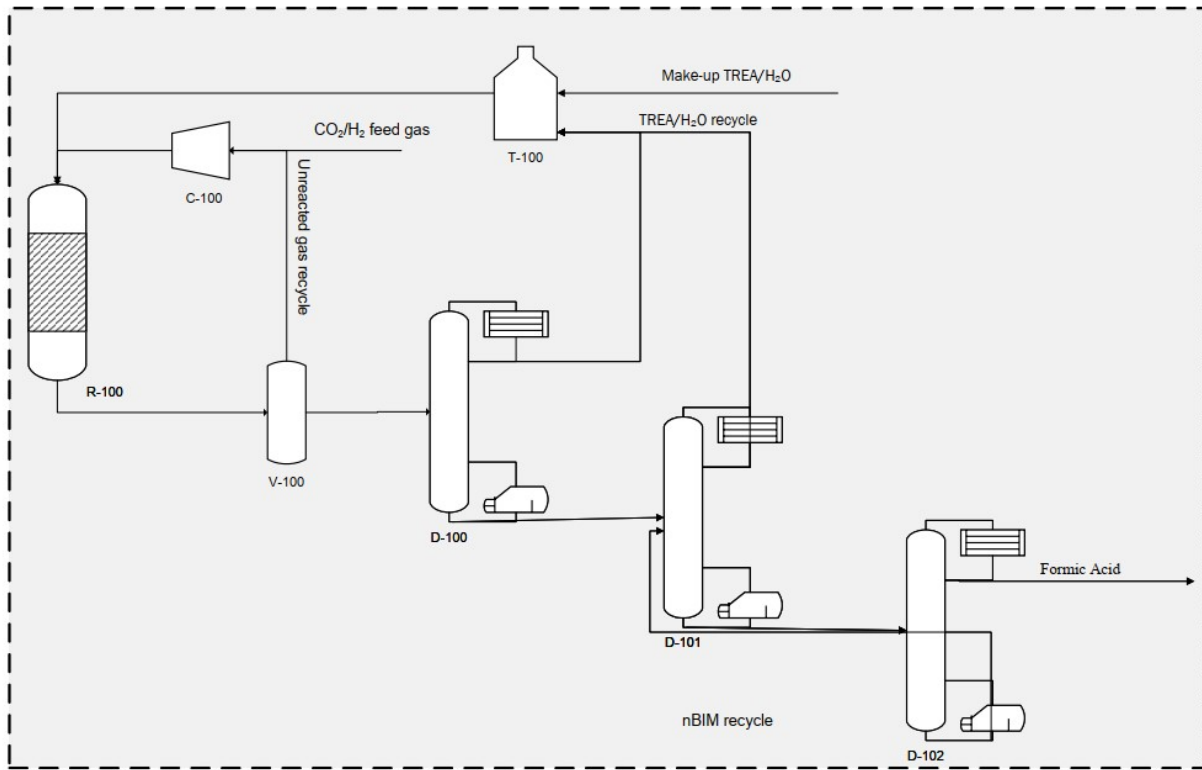

Fig.S6. System boundary of the thermo-catalytic process pathway

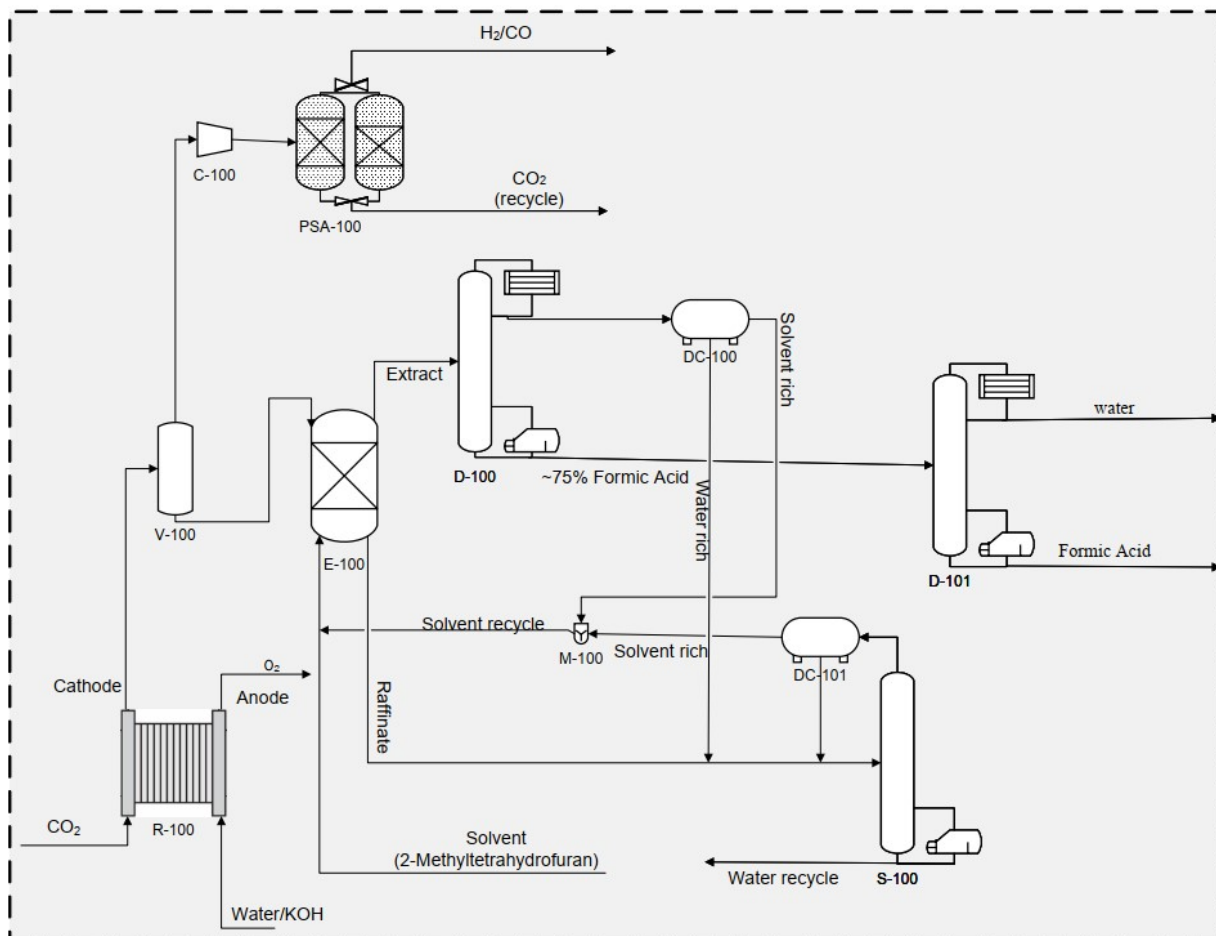

Fig.S7. System boundary of the electrochemical reduction process pathway

Table S6. LCA methodology and GWI values of the conventional pathway compared to previous works.

| Reference                   | This work                       | N. Thonemann et al (2019) <sup>20</sup> | D. Kang et al (2021) <sup>21</sup> | Y. Ahn et al (2019) <sup>23</sup> |
|-----------------------------|---------------------------------|-----------------------------------------|------------------------------------|-----------------------------------|
| Scope                       | Cradle to gate                  | Cradle to gate                          | Cradle to gate                     | Cradle to gate                    |
| Software                    | SimaPro LCA                     | openLCA 1.7.4                           | SimaPro LCA                        | SimaPro LCA                       |
| Database                    | Ecoinvent 3.9                   | –                                       | Ecoinvent 3                        | –                                 |
| LCIA method                 | ReCiPe 2016                     | ILCD 1.0.8 (2016)                       | ReCiPe 2008                        | ReCiPe 1.13                       |
| Lifetime horizon of the LCA | 100 years (GWP100)              | 100 years (GWP100)                      | 100 years (GWP100)                 | 100 years (GWP100)                |
| Purity                      | 85.0 wt% FA                     | 85.0 wt% FA                             | 98 wt%                             | 98%                               |
| GWI                         | 4.23 kgCO <sub>2eq</sub> /kg FA | 4.4 kgCO <sub>2eq</sub> /kg FA          | 2.04 kgCO <sub>2eq</sub> /kg FA    | 2.007 kgCO <sub>2eq</sub> /kg FA  |

Table S7. LCA methodology and GWI values of the thermo-catalytic pathway compared to previous works.

| Reference                   | This work                                | D. Kang et al (2021) <sup>21</sup> | Y. Ahn et al (2019) <sup>23</sup> |
|-----------------------------|------------------------------------------|------------------------------------|-----------------------------------|
| Scope                       | Cradle to gate                           | Cradle to gate                     | Cradle to gate                    |
| Software                    | SimaPro LCA                              | SimaPro LCA                        | SimaPro LCA                       |
| Database                    | Ecoinvent 3.9                            | Ecoinvent 3                        | –                                 |
| LCIA method                 | ReCiPe 2016                              | ReCiPe 2008                        | ReCiPe 1.13                       |
| Lifetime horizon of the LCA | 100 years (GWP100)                       | 100 years (GWP100)                 | 100 years (GWP100)                |
| Purity                      | 85.0 wt% FA                              | 99 wt%                             | 98%                               |
| GWI                         | 0.75 to 2.59 kg CO <sub>2eq</sub> /kg FA | 0.27 kg CO <sub>2eq</sub> /kg FA   | 0.098 kgCO <sub>2eq</sub> /kg FA  |

Table S8. LCA methodology and GWI values of the electrochemical reduction pathway compared to previous works.

| Reference                   | This work                               | A. Dominguez-Ramos et al (2015) <sup>19</sup>         | N. Thonemann et al (2019) <sup>20</sup> | D. Kang et al (2021) <sup>21</sup> | A. Banu et al (2023) <sup>22</sup> |
|-----------------------------|-----------------------------------------|-------------------------------------------------------|-----------------------------------------|------------------------------------|------------------------------------|
| Scope                       | Cradle to gate                          | Cradle to gate                                        | Cradle to gate                          | Cradle-to-gate                     | Cradle-to-gate                     |
| Software                    | SimaPro LCA                             | –                                                     | openLCA 1.7.4                           | SimaPro LCA                        | GaBi professional software         |
| Database                    | Ecoinvent 3.9                           | Ecoinvent v2.2                                        | Ecoinvent 3.4                           | Ecoinvent 3                        | –                                  |
| LCIA method                 | ReCiPe 2016                             | ReCiPe, 2011                                          | ILCD 1.0.8 (2016)                       | ReCiPe 2008                        | ReCiPe 1.08                        |
| Lifetime horizon of the LCA | 100 years (GWP100)                      | 100 years (GWP100)                                    | 100 years (GWP100)                      | 100 years (GWP100)                 | 10 years (GWP10)                   |
| Purity                      | 85 wt.%                                 | 84 wt.% formate solution                              | 85.0 wt.% FA                            | 85 wt.%                            | –                                  |
| GWI                         | 2.91 to 8.23 kgCO <sub>2eq</sub> /kg FA | 32 to 519 kg CO <sub>2eq</sub> / kg HCOO <sup>-</sup> | 4.2 to 7.2 kg CO <sub>2</sub> -eq/kg FA | 2 kgCO <sub>2eq</sub> /kg FA       | 3.27 kgCO <sub>2-eq</sub> /kg FA   |

Table S9. Total electricity and heat use per unit of product of the electrochemical reduction pathway

| Reference                                     | Electricity (MWh/Tonne FA) | Heat (MJ/Tonne FA) |
|-----------------------------------------------|----------------------------|--------------------|
| This work                                     | 2.98                       | 13.356             |
| D. Kang et al (2021) <sup>21</sup>            | 4.79                       | 21.78              |
| R. Aldoco et al (2019) <sup>24</sup>          | 4.59                       | 62                 |
| A. Dominguez-Ramos et al (2015) <sup>19</sup> | 8.259-16                   | 35-5169            |

Table S10. Yield of formic acid for the electrochemical reduction pathway

| Reference                          | CO <sub>2</sub> Conversion (%) | Faraday's efficiency (%) | Formic acid yield (%) |
|------------------------------------|--------------------------------|--------------------------|-----------------------|
| This work                          | 44                             | 90                       | 39.6                  |
| Z. Xing et al (2021) <sup>25</sup> | 35                             | 83                       | 29.05                 |
| Qian et al (2020) <sup>26</sup>    | 36                             | 81                       | 29.16                 |

Table S11. Heat and mass balance of Conventional pathway

| Stream Name    | Units   | Feed to R-100(CO) | MeOH with Recycle | R-100 to R-101 | Water feed to R-101 | D-101 to D-103 | D-103        |
|----------------|---------|-------------------|-------------------|----------------|---------------------|----------------|--------------|
| Description    |         |                   |                   |                |                     |                |              |
| From           |         |                   |                   |                |                     | D-101          | D-103        |
| To             |         | R-100             | R-100             | R-101          | R-101               | D-103          |              |
| Stream Class   |         | CONVEN            | CONVEN            | CONVEN         | CONVEN              | CONVEN         | CONVEN       |
| Temperature    | C       | 80                | 79.8526401        | 80             | 80                  | 158.6559053    | 25           |
| Pressure       | bar     | 40                | 40                | 3              | 3                   | 4.053          | 4            |
| Enthalpy Flow  | cal/sec | -                 | -15053754234      | -29683423.11   | -                   | -17969715.05   | -9235223.017 |
|                |         | 156789008.6       |                   |                | 382529113.6         |                |              |
| Average MW     |         | 28.0104           | 28.40887903       | 41.87809528    | 18.01528            | 25.91353893    | 36.82065841  |
| Mole Flows     | kmol/hr | 21650             | 2022439.133       | 1543.50942     | 20460               | 880.1403768    | 369.6589583  |
| CO             | kmol/hr | 21650             | 1996341.702       | 205.7666268    | 0                   | 2.91036E-35    | 0            |
| MF             | kmol/hr | 0                 | 25015.03052       | 827.2613747    | 0                   | 1.59179E-21    | 0            |
| METHANOL       | kmol/hr | 0                 | 1082.4            | 0              | 0                   | 4.45641E-13    | 0            |
| WATER          | kmol/hr | 0                 | 0                 | 510.4814185    | 20460               | 631.9619648    | 121.4805463  |
| FA             | kmol/hr | 0                 | 0                 | 3.00921E-09    | 0                   | 248.178412     | 248.178412   |
| Mole Fractions |         |                   |                   |                |                     |                |              |
| CO             |         | 1                 | 0.987096061       | 0.133310898    | 0                   | 3.3067E-38     | 0            |
| MF             |         | 0                 | 0.012368743       | 0.535961338    | 0                   | 1.80857E-24    | 0            |
| METHANOL       |         | 0                 | 0.000535195       | 0              | 0                   | 5.06329E-16    | 0            |
| WATER          |         | 0                 | 0                 | 0.330727764    | 1                   | 0.718024058    | 0.328628709  |
| FA             |         | 0                 | 0                 | 1.94959E-12    | 0                   | 0.281975942    | 0.671371291  |
| Mass Fractions |         |                   |                   |                |                     |                |              |
| CO             |         | 1                 | 0.973250493       | 0.089165745    | 0                   | 3.57427E-38    | 0            |
| MF             |         | 0                 | 0.026145864       | 0.768560514    | 0                   | 4.19121E-24    | 0            |

|          |   |             |             |   |             |             |
|----------|---|-------------|-------------|---|-------------|-------------|
| METHANOL | 0 | 0.000603643 | 0           | 0 | 6.26078E-16 | 0           |
| WATER    | 0 | 0           | 0.142273741 | 1 | 0.499175527 | 0.150788494 |
| FA       | 0 | 0           | 2.14267E-12 | 0 | 0.500824473 | 0.849211506 |

Table S12. Heat and mass balance of Thermo-catalytic pathway

| Stream Name      | Units   | CO <sub>2</sub> | H <sub>2</sub> | TREA     | H <sub>2</sub> O | R-100 feed with recycle | From R-100 to V-100 |
|------------------|---------|-----------------|----------------|----------|------------------|-------------------------|---------------------|
| Description      |         |                 |                |          |                  |                         |                     |
| From             |         |                 |                |          |                  |                         | R-100               |
| To               |         | C100            | C100           | T-100    | T-100            | R-100                   | V-100               |
| Stream Class     |         |                 | CONVEN         | CONVEN   | CONVEN           | CONVEN                  | CONVEN              |
| Temperature      | C       | 25              | 25             | 25       | 25               | 120                     | 120                 |
| Pressure         | bar     | 1               | 30             | 120      | 120              | 120                     | 120                 |
| Enthalpy Flow    | cal/sec | -15990156.5     | 1025.9174      | -3933304 | -62473484        | -79591740.11            | -81137215.78        |
| Average MW       |         | 44              | 2              | 101      | 18               | 24.81784387             | 28.26006907         |
| Mole Flows       | kmol/hr | 612             | 612            | 324      | 3294             | 4842                    | 4254.48             |
| CO <sub>2</sub>  | kmol/hr | 612             | 0              | 0        | 0                | 612                     | 318.24              |
| H <sub>2</sub>   | kmol/hr | 0               | 612            | 0        | 0                | 612                     | 318.24              |
| H <sub>2</sub> O | kmol/hr | 0               | 0              | 0        | 3294             | 3294                    | 3294                |
| N <sub>2</sub>   | kmol/hr | 0               | 0              | 0        | 0                | 0                       | 0                   |
| O <sub>2</sub>   | kmol/hr | 0               | 0              | 0        | 0                | 0                       | 0                   |

|                  |         |   |   |     |   |             |             |
|------------------|---------|---|---|-----|---|-------------|-------------|
| NTRIET           | kmol/hr | 0 | 0 | 0   | 0 | 0           | 0           |
| TREA             | kmol/hr | 0 | 0 | 324 | 0 | 324         | 30.24       |
| AMMON-01         | kmol/hr | 0 | 0 | 0   | 0 | 0           | 0           |
| HCOOH            | kmol/hr | 0 | 0 | 0   | 0 | 0           | 0           |
| TREA-FO          | kmol/hr | 0 | 0 | 0   | 0 | 0           | 293.76      |
| N-ISO-01         | kmol/hr | 0 | 0 | 0   | 0 | 0           | 0           |
| Mole Fractions   |         |   |   |     |   |             |             |
| CO <sub>2</sub>  |         | 1 | 0 | 0   | 0 | 0.126394052 | 0.074801151 |
| H <sub>2</sub>   |         | 0 | 1 | 0   | 0 | 0.126394052 | 0.074801151 |
| H <sub>2</sub> O |         | 0 | 0 | 0   | 1 | 0.680297398 | 0.774242681 |
| N <sub>2</sub>   |         | 0 | 0 | 0   | 0 | 0           | 0           |
| O <sub>2</sub>   |         | 0 | 0 | 0   | 0 | 0           | 0           |
| NTRIET           |         | 0 | 0 | 0   | 0 | 0           | 0           |
| TREA             |         | 0 | 0 | 1   | 0 | 0.066914498 | 0.007107802 |
| AMMON-01         |         | 0 | 0 | 0   | 0 | 0           | 0           |
| HCOOH            |         | 0 | 0 | 0   | 0 | 0           | 0           |
| TREA-FO          |         | 0 | 0 | 0   | 0 | 0           | 0.069047216 |
| N-ISO-01         |         | 0 | 0 | 0   | 0 | 0           | 0           |
| Mass Fractions   |         |   |   |     |   |             |             |
| CO <sub>2</sub>  |         | 1 | 0 | 0   | 0 | 0.224086279 | 0.116462937 |



|                  |   |   |   |   |             |             |
|------------------|---|---|---|---|-------------|-------------|
| H <sub>2</sub>   | 0 | 1 | 0 | 0 | 0.01018574  | 0.00529377  |
| H <sub>2</sub> O | 0 | 0 | 0 | 1 | 0.493409227 | 0.493146999 |
| N <sub>2</sub>   | 0 | 0 | 0 | 0 | 0           | 0           |
| O <sub>2</sub>   | 0 | 0 | 0 | 0 | 0           | 0           |
| NTRIET           | 0 | 0 | 0 | 0 | 0           | 0           |
| TREA             | 0 | 0 | 1 | 0 | 0.272318754 | 0.025402909 |
| AMMON-01         | 0 | 0 | 0 | 0 | 0           | 0           |
| HCOOH            | 0 | 0 | 0 | 0 | 0           | 0           |
| TREA-FO          | 0 | 0 | 0 | 0 | 0           | 0.359693385 |
| N-ISO-01         | 0 | 0 | 0 | 0 | 0           | 0           |

| Stream Name   | Units   | V-100 to D-100 | D-100 to D-101 | nBIM         | D-101 to D-102 | D-102 Distillate |
|---------------|---------|----------------|----------------|--------------|----------------|------------------|
| Description   |         |                |                |              |                |                  |
| From          |         | V-100          | D-100          | D-102        | D-101          | D-102            |
| To            |         | D-100          | D-101          | D-101        | D-102          |                  |
| Stream Class  |         | CONVEN         | CONVEN         | CONVEN       | CONVEN         | CONVEN           |
| Temperature   | C       | 100            | 34.61082716    | 25           | 100            | 29.11059499      |
| Pressure      | bar     | 120            | 0.199983553    | 0.199983553  | 0.133322368    | 0.066661184      |
| Enthalpy Flow | cal/sec | -74789011.65   | -11598123.81   | -1048297.032 | -9558658.557   | -8686064.137     |
| Average MW    |         | 27.98776683    | 66.62370624    | 124.18576    | 76.24208293    | 37.50160635      |

|                  |         |             |             |     |             |             |
|------------------|---------|-------------|-------------|-----|-------------|-------------|
| Mole Flows       | kmol/hr | 3912.356832 | 661.8297544 | 276 | 628.3459354 | 356.4989791 |
| CO <sub>2</sub>  | kmol/hr | 265.203606  | 0           | 0   | 0           | 0.37497292  |
| H <sub>2</sub>   | kmol/hr | 0.012593845 | 0           | 0   | 0           | 2.16122E-11 |
| H <sub>2</sub> O | kmol/hr | 3077.64008  | 92.32920241 | 0   | 92.26638277 | 108.402864  |
| N <sub>2</sub>   | kmol/hr | 0           | 0           | 0   | 0           | 0           |
| O <sub>2</sub>   | kmol/hr | 0           | 0           | 0   | 0           | 0           |
| NTRIET           | kmol/hr | 0           | 0           | 0   | 0           | 0           |
| TREA             | kmol/hr | 295.0464022 | 295.0464022 | 0   | 9.17039E-21 | 0           |
| AMMON-01         | kmol/hr | 0           | 0           | 0   | 0           | 0           |
| HCOOH            | kmol/hr | 274.4541498 | 274.4541498 | 0   | 260.0795527 | 247.7211422 |
| TREA-FO          | kmol/hr | 0           | 0           | 0   | 0           | 0           |
| N-ISO-01         | kmol/hr | 0           | 0           | 276 | 276         | 6.2393E-224 |
| Mole Fractions   |         |             |             |     |             |             |
| CO <sub>2</sub>  |         | 0.06778615  | 0           | 0   | 0           | 0.00105182  |
| H <sub>2</sub>   |         | 3.21899E-06 | 0           | 0   | 0           | 6.06236E-14 |
| H <sub>2</sub> O |         | 0.786646058 | 0.139505971 | 0   | 0.146840104 | 0.304076226 |
| N <sub>2</sub>   |         | 0           | 0           | 0   | 0           | 0           |
| O <sub>2</sub>   |         | 0           | 0           | 0   | 0           | 0           |
| NTRIET           |         | 0           | 0           | 0   | 0           | 0           |
| TREA             |         | 0.075413981 | 0.445804076 | 0   | 1.45945E-23 | 0           |

|                  |             |             |   |             |             |
|------------------|-------------|-------------|---|-------------|-------------|
| AMMON-01         | 0           | 0           | 0 | 0           | 0           |
| HCOOH            | 0.070150592 | 0.414689953 | 0 | 0.413911411 | 0.694871954 |
| TREA-FO          | 0           | 0           | 0 | 0           | 0           |
| N-ISO-01         | 0           | 0           | 1 | 0.439248485 | 1.7502E-226 |
| Mass Fractions   |             |             |   |             |             |
| CO <sub>2</sub>  | 0.106567652 | 0           | 0 | 0           | 0.001234083 |
| H <sub>2</sub>   | 2.30028E-07 | 0           | 0 | 0           | 3.23312E-15 |
| H <sub>2</sub> O | 0.505922074 | 0.0376909   | 0 | 0.034667493 | 0.145950336 |
| N <sub>2</sub>   | 0           | 0           | 0 | 0           | 0           |
| O <sub>2</sub>   | 0           | 0           | 0 | 0           | 0           |
| NTRIET           | 0           | 0           | 0 | 0           | 0           |
| TREA             | 0.272147902 | 0.675828684 | 0 | 1.93337E-23 | 0           |
| AMMON-01         | 0           | 0           | 0 | 0           | 0           |
| HCOOH            | 0.115362142 | 0.286480416 | 0 | 0.249869277 | 0.852815581 |
| TREA-FO          | 0           | 0           | 0 | 0           | 0           |
| N-ISO-01         | 0           | 0           | 1 | 0.71546323  | 5.7956E-226 |

Table S13. Heat and mass balance of Electrochemical reduction pathway

| Stream Name | Units | CO <sub>2</sub> | water/KOH | R-100 to V-100 | O <sub>2</sub> | Solvent |
|-------------|-------|-----------------|-----------|----------------|----------------|---------|
| Description |       |                 |           |                |                |         |
| From        |       |                 |           | R-100          | R-100          |         |

| To               |         | R-100        | R-100        | V-100        |             | E-100       |
|------------------|---------|--------------|--------------|--------------|-------------|-------------|
| Stream Class     |         | CONVEN       | CONVEN       | CONVEN       | CONVEN      | CONVEN      |
| Temperature      | C       | 25           | 25           | 25           | 25          | 40          |
| Pressure         | bar     | 1            | 1            | 1            | 81.00000278 | 1           |
| Enthalpy Flow    | cal/sec | -7637021.468 | -155085860.9 | -165358205.7 | 2.31099E-11 | -27461733.5 |
| Average MW       |         | 44.0098      | 18.08527022  | 19.92982037  | 31.9988     | 86.1338     |
| Mole Flows       | kmol/hr | 292.3261806  | 8163.360481  | 8561.018596  | 187.004873  | 1620        |
| H <sub>2</sub> O | kmol/hr | 0            | 8148.360481  | 7780.472928  | 0           | 0           |
| CO <sub>2</sub>  | kmol/hr | 292.3261806  | 0            | 391.4228634  | 0           | 0           |
| HCOOH            | kmol/hr | 0            | 0            | 260.6421236  | 0           | 0           |
| O <sub>2</sub>   | kmol/hr | 0            | 0            | 0            | 187.004873  | 0           |
| CO               | kmol/hr | 0            | 0            | 6.122193882  | 0           | 0           |
| H <sub>2</sub>   | kmol/hr | 0            | 0            | 107.3584858  | 0           | 0           |
| KOH              | kmol/hr | 0            | 15.00000049  | 15.00000049  | 0           | 0           |
| 2-MET-01         | kmol/hr | 0            | 0            | 0            | 0           | 1620        |
| Mole Fractions   |         |              |              |              |             |             |
| H <sub>2</sub> O |         | 0            | 0.998162521  | 0.908825608  | 0           | 0           |
| CO <sub>2</sub>  |         | 1            | 0            | 0.045721529  | 0           | 0           |
| HCOOH            |         | 0            | 0            | 0.030445223  | 0           | 0           |
| O <sub>2</sub>   |         | 0            | 0            | 0            | 1           | 0           |
| CO               |         | 0            | 0            | 0.000715124  | 0           | 0           |
| H <sub>2</sub>   |         | 0            | 0            | 0.012540387  | 0           | 0           |
| KOH              |         | 0            | 0.001837479  | 0.001752128  | 0           | 0           |
| 2-MET-01         |         | 0            | 0            | 0            | 0           | 1           |
| Mass Fractions   |         |              |              |              |             |             |
| H <sub>2</sub> O |         | 0            | 0.99429962   | 0.821520089  | 0           | 0           |
| CO <sub>2</sub>  |         | 1            | 0            | 0.100964049  | 0           | 0           |
| HCOOH            |         | 0            | 0            | 0.070309821  | 0           | 0           |
| O <sub>2</sub>   |         | 0            | 0            | 0            | 1           | 0           |

|                |   |            |             |   |   |
|----------------|---|------------|-------------|---|---|
| CO             | 0 | 0          | 0.001005073 | 0 | 0 |
| H <sub>2</sub> | 0 | 0          | 0.001268447 | 0 | 0 |
| KOH            | 0 | 0.00570038 | 0.004932521 | 0 | 0 |
| 2-MET-01       | 0 | 0          | 0           | 0 | 1 |

| Stream Name      | Units   | V-100 to E-100 | E-100 to D-100 | D-100 to D-101 | D-101       |
|------------------|---------|----------------|----------------|----------------|-------------|
| Description      |         |                |                |                |             |
| From             |         | V-100          | E-100          | D-100          | D-101       |
| To               |         | E-100          | D-100          | D-101          |             |
| Stream Class     |         | CONVEN         | CONVEN         | CONVEN         | CONVEN      |
| Temperature      | C       | 40             | 45.88817494    | 114.8619566    | 25          |
| Pressure         | bar     | 1              | 1.1            | 5.1            | 4           |
| Enthalpy Flow    | cal/sec | -152321371.8   | -50598505.48   | -11326836.34   | -           |
| Average MW       |         | 19.03372859    | 58.65799418    | 32.8046018     | 8431871.724 |
| Mole Flows       | kmol/hr | 7946.903461    | 2707.793959    | 514.4808522    | 41.49039323 |
| H <sub>2</sub> O | kmol/hr | 7662.107075    | 926.5722468    | 248.322803     | 324.1229369 |
| CO <sub>2</sub>  | kmol/hr | 14.23911279    | 14.01372085    | 5.80619E-50    | 57.96489617 |
| HCOOH            | kmol/hr | 255.3933502    | 255.1616312    | 250.916971     | 0           |
| O <sub>2</sub>   | kmol/hr | 0              | 0              | 0              | 250.9169625 |
| CO               | kmol/hr | 0.037354884    | 0.023749338    | 4.43649E-64    | 0           |
| H <sub>2</sub>   | kmol/hr | 0.126567157    | 0.070387709    | 3.38629E-74    | 0           |
| KOH              | kmol/hr | 15.00000049    | 14.99999804    | 15.24107824    | 15.24107824 |
| 2-MET-01         | kmol/hr | 0              | 1496.952225    | 3.3195E-28     | 0           |
| Mole Fractions   |         |                |                |                |             |
| H <sub>2</sub> O |         | 0.964162597    | 0.342187131    | 0.482666754    | 0.178836144 |
| CO <sub>2</sub>  |         | 0.001791781    | 0.005175328    | 1.12855E-52    | 0           |
| HCOOH            |         | 0.032137467    | 0.094232292    | 0.487709056    | 0.774141333 |

|                  |             |             |             |             |
|------------------|-------------|-------------|-------------|-------------|
| O <sub>2</sub>   | 0           | 0           | 0           | 0           |
| CO               | 4.70056E-06 | 8.77073E-06 | 8.62323E-67 | 0           |
| H <sub>2</sub>   | 1.59266E-05 | 2.59945E-05 | 6.58196E-77 | 0           |
| KOH              | 0.001887528 | 0.005539564 | 0.029624189 | 0.047022523 |
| 2-MET-01         | 0           | 0.55283092  | 6.45214E-31 | 0           |
| Mass Fractions   |             |             |             |             |
| H <sub>2</sub> O | 0.912572598 | 0.105093893 | 0.26506576  | 0.077651306 |
| CO <sub>2</sub>  | 0.004142958 | 0.003882934 | 1.51404E-52 | 0           |
| HCOOH            | 0.077711983 | 0.073938862 | 0.684268052 | 0.858762198 |
| O <sub>2</sub>   | 0           | 0           | 0           | 0           |
| CO               | 6.91743E-06 | 4.18821E-06 | 7.36299E-67 | 0           |
| H <sub>2</sub>   | 1.6868E-06  | 8.93344E-07 | 4.04469E-78 | 0           |
| KOH              | 0.005563857 | 0.005298524 | 0.050666188 | 0.063586497 |
| 2-MET-01         | 0           | 0.811780705 | 1.69411E-30 | 0           |

## References

1. Hirata M, Suda S, Y. Kagaku Kogaku. Vapor Pressure of Methanol in High Pressure Regions. 1967;31:339–41.
2. Park K, Gunasekar GH, Kim SH, Park H, Kim S, Park K, et al. CO<sub>2</sub> hydrogenation to formic acid over heterogenized ruthenium catalysts using a fixed bed reactor with separation units. *Green Chemistry*. 2020 Mar 7;22(5):1639–49.
3. Glass M, Aigner M, Viell J, Jupke A, Mitsos A. Liquid-liquid equilibrium of 2-methyltetrahydrofuran/water over wide temperature range: Measurements and rigorous regression. *Fluid Phase Equilib*. 2017 Feb 15;433:212–25.
4. Zhu X, Shi Y, Li S, Cai N. Elevated temperature pressure swing adsorption process for reactive separation of CO/CO<sub>2</sub> in H<sub>2</sub>-rich gas. *Int J Hydrogen Energy*. 2018 Jul 19;43(29):13305–17.
5. Laitinen AT, Parsana VM, Jauhiainen O, Huotari M, Van Den Broeke LJP, De Jong W, et al. Liquid-Liquid Extraction of Formic Acid with 2-Methyltetrahydrofuran: Experiments, Process Modeling, and Economics. *Ind Eng Chem Res*. 2021 Apr 21;60(15):5588–99.
6. Jiang X, Lin L, Rong Y, Li R, Jiang Q, Yang Y, et al. Boosting CO<sub>2</sub> electroreduction to formate via bismuth oxide clusters. *Nano Res*. 2023 Oct 1;16(10):12050–7.
7. Fernández-Caso K, Díaz-Sainz G, Alvarez-Guerra M, Irabien A. Electroreduction of CO<sub>2</sub>: Advances in the Continuous Production of Formic Acid and Formate. Vol. 8, *ACS Energy Letters*. American Chemical Society; 2023. p. 1992–2024.
8. Spurgeon JM, Kumar B. A comparative technoeconomic analysis of pathways for commercial electrochemical CO<sub>2</sub> reduction to liquid products. *Energy Environ Sci*. 2018 Jun 1;11(6):1536–51.
9. Li X, Anderson P, Jhong HRM, Paster M, Stubbins JF, Kenis PJA. Greenhouse Gas Emissions, Energy Efficiency, and Cost of Synthetic Fuel Production Using Electrochemical CO<sub>2</sub> Conversion and the Fischer-Tropsch Process. *Energy and Fuels*. 2016 Jul 21;30(7):5980–9.
10. Al-Qahtani A, Parkinson B, Hellgardt K, Shah N, Guillen-Gosalbez G. Uncovering the true cost of hydrogen production routes using life cycle monetisation. *Appl Energy*. 2021 Jan 1;281.
11. Yang H, Zhang C, Gao P, Wang H, Li X, Zhong L, et al. A review of the catalytic hydrogenation of carbon dioxide into value-added hydrocarbons. Vol. 7, *Catalysis Science and Technology*. Royal Society of Chemistry; 2017. p. 4580–98.
12. Atsbha TA, Yoon T, Yoo BH, Lee CJ. Techno-economic and environmental analysis for direct catalytic conversion of CO<sub>2</sub> to methanol and liquid/high-calorie-sng fuels. *Catalysts*. 2021 Jun 1;11(6).

13. Sigma-Aldrich. ruthenium(ii) catalyst. [accessed 2023 May 4]. Available from: [https://www.sigmaaldrich.com/KR/en/search/ruthenium\(ii\)](https://www.sigmaaldrich.com/KR/en/search/ruthenium(ii))
14. Sigma-Aldrich. Bismuth(III) oxide catalyst. [accessed 2023 May 4]. Available from: <https://www.sigmaaldrich.com/KR/en/product/aldrich/202827>
15. Sengupta D, Pike RW. Chemicals From Biomass – Integrating Bioprocesses into Chemical Production Complexes for Sustainable Development. 1st ed. Boca Raton,FL: CRC Press; 2013.
16. Turton Richard. Analysis, synthesis, and design of chemical processes. Prentice Hall; 2012. 1007 p.
17. Energy Agency I. Direct Air Capture: A key technology for net zero [Internet]. [accessed 2024 Jan 1]. Available from: [www.iea.org/t&c/](http://www.iea.org/t&c/)
18. Peters MS, Timmerhaus KD, West RE. Plant Design and Economics for Chemical Engineers. Vol. 35, Journal of Chemical Education. McGraw-Hill Companies, Inc., 1221 Avenue of the Americas, New York, NY 10020; 2003. A506 p.
19. Dominguez-Ramos A, Singh B, Zhang X, Hertwich EG, Irabien A. Global warming footprint of the electrochemical reduction of carbon dioxide to formate. J Clean Prod. 2015 Oct 1;104:148–55.
20. Thonemann N, Schulte A. Supporting Information: From laboratory to industrial scale: A prospective LCA for electrochemical reduction of CO<sub>2</sub> to formic acid.
21. Kang D, Byun J, Han J. Evaluating the environmental impacts of formic acid production from acid production from CO<sub>2</sub>: Catalytic hydrogenation: Vs. electrocatalytic reduction. Green Chemistry. 2021 Dec 7;23(23):9470–8.
22. Banu A, Mir N, Ewis D, El-Naas MH, Amhamed AI, Bicer Y. Formic acid production through electrochemical reduction of CO<sub>2</sub>: A life cycle assessment. Energy Conversion and Management: X. 2023 Oct 1;20.
23. Ahn Y, Byun J, Kim D, Kim BS, Lee CS, Han J. System-level analysis and life cycle assessment of CO<sub>2</sub> and fossil-based formic acid strategies. Green Chemistry. 2019;21(12):3442–55.
24. Aldaco R, Butnar I, Margallo M, Laso J, Rumayor M, Dominguez-Ramos A, et al. Bringing value to the chemical industry from capture, storage and use of CO<sub>2</sub>: A dynamic LCA of formic acid production. Science of the Total Environment. 2019 May 1;663:738–53.
25. Xing Z, Hu X, Feng X. Tuning the Microenvironment in Gas-Diffusion Electrodes Enables High-Rate CO<sub>2</sub>Electrolysis to Formate. ACS Energy Lett. 2021 May 14;6(5):1694–702.
26. Qian Y, Liu Y, Tang H, Lin BL. Highly efficient electroreduction of CO<sub>2</sub>to formate by nanorod@2D nanosheets SnO. Journal of CO<sub>2</sub> Utilization. 2020 Dec 1;42.
